# Supplementary material
Source: publisher site journal article supplement (https://www.spandidos-publications.com/2788/downloadSupplementary)

Figure S1. Multi-slice spiral CT portal venography in CTPV patients with or without cirrhosis. Patient 1, CTPV patient with cirrhosis; LS, 12.9 kPa. Patient 2, CTPV patient without cirrhosis; LS, 6.1 kPa. CT, computed tomography; LS, liver stiffness; CTPV, cavernous transformation of the portal vein.

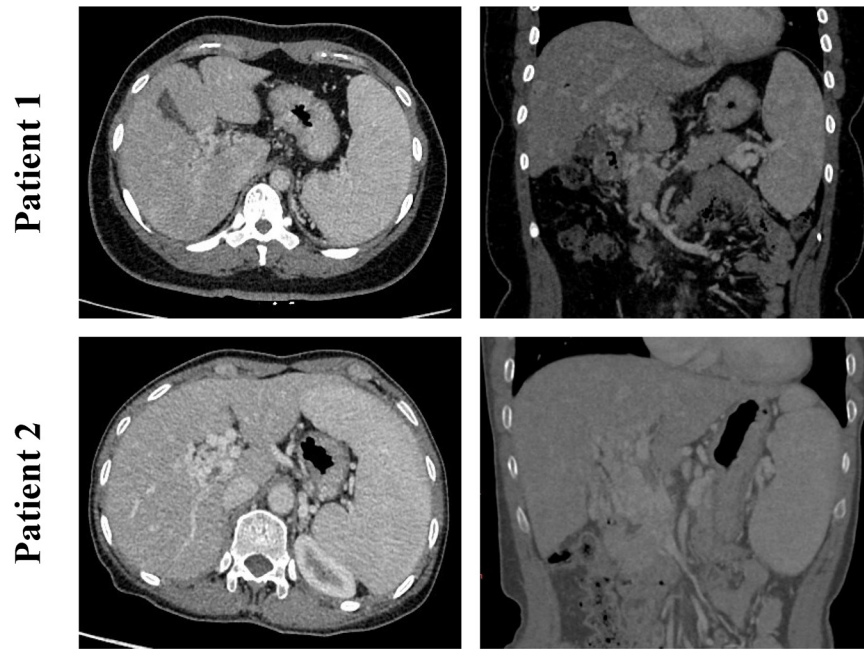

Supplement: Supplementary file 1 [file downloadSupplementary]
